# Supplementary material for: Acetabular cup position and risk of dislocation in primary total hip arthroplasty: A systematic review of the literature
Source: PubMed Central journal article supplement — Acta Orthop. 2016 Oct 26;88(1):10–7. doi: 10.1080/17453674.2016.1251255 (PMC5251254; doi:10.1080/17453674.2016.1251255), 2016-10-26
Supplement: IORT_A_1251255_SM4625.pdf [file IORT_A_1251255_SM4625.pdf]

## Supplementary data

Table 4. Patient characteristics in articles included in the review

| Article                      | Mean age      | Sex<br>(female:male) | Diagnoses               | Patient details                                                                     |
|------------------------------|---------------|----------------------|-------------------------|-------------------------------------------------------------------------------------|
| Lewinnek et al. (1978)       | 63.1          | NA                   | Yes                     | Age, sex (D only)                                                                   |
| Lindberg et al. (1982)       | NA            | 0.60                 | Yes                     | Sex (D only)                                                                        |
| Pierchon et al. (1994)       | 57            | 0.53                 | Yes                     | Age, sex (D only)                                                                   |
| Pollard et al. (1995)        | 52            | 0.53                 | Yes (D only)            | Age, sex                                                                            |
| Paterno et al. (1997)        | 58.9          | 0.68                 | Yes                     | Sex, age, alcohol intake, obesity                                                   |
| Kennedy et al. (1998)        | 69            | 0.33                 | Yes                     | Age, sex                                                                            |
| Woolson et al. (1999)        | 64.3          | 0.50                 | Yes                     | Age, sex, obesity                                                                   |
| Li et al. (1999)             | 66            | 0.55                 | No                      | Age, sex, obesity                                                                   |
| Jolles et al. (2002)         | 69            | 0.57                 | Yes                     | Age, sex, alcohol intake                                                            |
| Nishii et al. (2004)         | 53.7          | 0.82                 | Yes                     | Age, sex                                                                            |
| Biedermann et al. (2005)     | 68            | 0.58                 | No                      | Age + sex (D only w/ revision)                                                      |
| Masaoka et al. (2005)        | 61.6          | 0.79                 | Yes                     | Age, sex, obesity                                                                   |
| Minoda et al. (2006)         | 62.1          | 0.90                 | No                      | Age, sex, obesity                                                                   |
| Rittmeister et al. (2006)    | 65 (median)   | 0.61                 | Yes                     | Age, sex                                                                            |
| Kim et al. (2009)            | 57            | 0.37                 | Yes                     | Age, sex, obesity                                                                   |
| Dudda et al. (2009)          | 70            | 0.66                 | Yes                     | Age, sex, obesity                                                                   |
| Moskal et al. (2011)         | 59.1          | 0.42                 | Incomplete              | Age, sex, obesity                                                                   |
| Leichtle et al. (2013)       | NA            | NA                   | No                      | No                                                                                  |
| Jørgensen et al. (2014)      | 70.0 (median) | 0.54                 | Yes (D only)            | Age, sex, obesity, alcohol intake, social, walking aids, CVD, psychiatric, diabetes |
| Esposito et al. (2014)       | 66            | 0.58                 | Yes                     | Age, sex, obesity                                                                   |
| Grammatopoulos et al. (2015) | 37.5          | 0.62                 | Yes                     | Age, sex, obesity                                                                   |
| McLawnhorn et al. (2015)     | 57.7          | 0.59                 | Yes                     | Age, sex, obesity                                                                   |
| Fujishiro et al. (2015)      | 62.5          | 0.84                 | Yes                     | Age, sex                                                                            |
| Danoff et al. (2015)         | NA            | 0.57                 | Yes                     | Age, sex, obesity                                                                   |
| García-Rey et al. (2015)     | 60.1          | 0.48                 | Yes (16% hip dysplasia) | Age, sex, obesity, physical activity                                                |
| Opperer et al. (2015)        | 68.9          | 0.51                 | Yes                     | Age, sex                                                                            |
| Abdel et al. (2016)          | 63            | 0.63                 | Yes                     | Age, sex, obesity                                                                   |
| Timperley et al. (2016)      | 68.2          | NA                   | Incomplete              | Age                                                                                 |

NA: not assessable; D: dislocators; CVD: cardiovascular disease.

Table 5. Study characteristics for articles included in the review

| Article                             | Study type                                                           | A             | B            | C       | D    | E                                                                           | F                                                                              | G           | H                   |
|-------------------------------------|----------------------------------------------------------------------|---------------|--------------|---------|------|-----------------------------------------------------------------------------|--------------------------------------------------------------------------------|-------------|---------------------|
| Lewinnek et al. (1978)              | Case-Control                                                         | 300 (122)     |              | 9       | 3    | Posterolateral                                                              | Radiographic: AP                                                               | NA          | NA                  |
| Lindberg et al. (1982)              | Case-Control                                                         | 1739 (295)    |              | 56      | 3.22 | Posterolateral                                                              | Radiographic: AP<br>- McLarren (A)                                             | NA          | NA                  |
| Pierchon et al. (1994)              | Case-Control                                                         | NA (52)       |              | 38      | NA   | Posterolateral                                                              | Radiographic: AP,<br>Anatomical: CT (A)                                        | NA          | NA                  |
| Pollard et al. (1995)               | Retrospective<br>Case-Control                                        | 97            | 74           | 7       | 7.21 | Posterior (84%),<br>direct lateral,<br>transstrochanteric,<br>anterolateral | Radiographic: AP +<br>lateral                                                  | NA          | ≥ 2 y               |
| Paterno et al. (1997)               | Case-Control                                                         | 391 (34)      | 317          | 17      | 4.34 | Posterior (98%),<br>transstrochanteric                                      | Radiographic: AP<br>+ lateral                                                  | 28<br>(98%) | Mean<br>5–6 y       |
| Kennedy et al. (1998)               | Retrospective<br>Cohort Study                                        | 75            |              | 4       | 5.33 | Posterolateral                                                              | Radiographic: AP<br>+ axiolateral -<br>Engh et al. (I)                         | 28mm        | ≥ 4 y               |
| Woolson et al. (1999)               | Case-Control                                                         |               | 522          | 14      | 4.44 | Posterior<br>(298 hips) +<br>lateral (228 hips)                             | Radiographic: AP                                                               | 28          | 3 m                 |
| Li et al. (1999)<br>Case-Control    | Retrospective                                                        | 812           |              | 24      | 2.96 | Posterior (66%),<br>transstrochanteric                                      | Operative:<br>goniometer<br>Radiographic: AP                                   | 28          | NA                  |
| Jolles et al. (2002)                | Case-Control                                                         | 2023 (42)     |              | 30 (21) | 1.48 | Posterolateral                                                              | Radiographic: AP<br>+ lateral -<br>McCollum & Gray                             | 28          | NA                  |
| Nishii et al. (2004)                | Case-Control                                                         | 217<br>(191)  | 179<br>(156) | 10      | 4.61 | Posterolateral                                                              | Anatomical: CT<br>- Mian et al. (A)                                            | 28          | ≥ 2 y               |
| Biedermann et al. (2005)            | Case-Control                                                         | 3781 (433)    |              | 91      | 2.41 | Transgluteal                                                                | Radiographic: AP<br>(EBRA)                                                     | 28<br>(94%) | NA                  |
| Masaoka et al. (2005)               | Case-Control                                                         | 317           | 266          | 10      | 3.15 | Posterior                                                                   | Radiographic: AP<br>Lewinnek et al. (A)                                        | 28          | ≥ 5 y               |
| Minoda et al. (2006)<br>Case Series | Retrospective                                                        | 834           |              | 28      | 3.36 | Posterolateral                                                              | Radiographic: AP<br>+ Judet oblique -<br>Lewinnek, Thoren<br>& Sahlstedt       | NA          | ≥ 3 m               |
| Rittmeister et al. (2006)           | Case Series                                                          | 512 (361)     | 505          | 36      | 7.03 | Anterolateral (76%),<br>posterior                                           | Radiographic: AP<br>- Pradhan (A)                                              | NA          | 18 m                |
| Kim et al. (2009)                   | Prospective<br>Case-Control                                          | 1648          | 1268         | 60      | 3.64 | Posterolateral                                                              | Anatomical: CT<br>- Mian et al. (A);<br>Plain radiograph<br>reconstruction (I) | 28          | ≥ 2 y               |
| Dudda et al. (2009)                 | Case-Control                                                         |               | 36326        | 175     | 0.48 | Anterolateral,<br>lateral, posterior                                        | NA                                                                             | 22–<br>37   | NA                  |
| Moskal et al. (2011)                | Literature<br>Review                                                 | (826)<br>1479 |              | 25      | 1.69 | No                                                                          | NA                                                                             | NA          | NA                  |
| Leichtle et al. (2013)              | Retrospective<br>Case-Control                                        | 5205<br>(111) |              | 91 (56) | 1.75 | Transgluteal                                                                | Radiographic: AP<br>+ 40° rotated tube<br>- Lembeck et al.                     | NA          | NA                  |
| Jørgensen et al. (2014)             | Retrospective<br>Review of<br>Prospectively-<br>Collected Data       | 2734          |              | 65      | 2.38 | Posterolateral                                                              | Radiographic                                                                   | M           | ≥ 3 m               |
| Esposito et al. (2014)              | Retrospective<br>Case-Control<br>from a Prospective<br>Data Registry | 7040<br>(294) |              | 147     | 2.09 | Posterolateral (98%)                                                        | Radiographic:<br>AP + lateral (EBRA)                                           | M           | ≥ 6 m               |
| Grammatopoulos et al.<br>(2015)     | Case-Control                                                         | 1070          |              | 22      | 2.06 | Anterolateral (74%),<br>posterior                                           | Radiographic: AP<br>+ lateral (EBRA)                                           | 22, 26, 28  | 5 y                 |
| McLawnhorn et al. (2015)            | Retrospective<br>Case-Control                                        | 553           | 479          | 6       | 1.13 | Posterolateral                                                              | Operative: CAS +<br>Radiographic: AP<br>(EBRA)                                 | 32, 36      | ≥ 6 m<br>mean 2.4 y |
| Fujishiro et al. (2015)<br>(71%)    | Case-Control<br>from a<br>Data Registry                              | 1555          | 1294         | 50      | 3.22 | Posterolateral                                                              | Radiographic: AP (I),<br>Anatomical: CT (A)                                    | 28          | ≥ 33 m              |
| Danoff et al. (2015)                | Prospective<br>Cohort                                                | 1289          |              | 42      | 3.29 | Posterior                                                                   | Radiographic: AP<br>+ lateral (HAS)                                            | 32 (39%)    | ≥ 6 m               |
| García-Rey et al. (2015)            | Case-Control                                                         | 1414          | 1318         | 38      | 2.69 | Posterolateral                                                              | Radiographic: AP<br>- Widmer (A)                                               | 28, 32      | 2                   |

|                         |                                                   |            |      |         |      |                                                           |                                                           |                                      |                     |
|-------------------------|---------------------------------------------------|------------|------|---------|------|-----------------------------------------------------------|-----------------------------------------------------------|--------------------------------------|---------------------|
| Opperer et al. (2015)   | Retrospective Case-Control                        | 1487 (148) | 1334 | 38 (37) | 2.56 | Posterolateral                                            | Radiographic: AP - (Sectra IDS7 PACS) Lewinnek et al. (A) | 28, 32<br>mean 18 m                  | 1-80 m              |
| Abdel et al. (2016)     | Retrospective Case Series                         | 9784 (206) |      | 206     | 2.11 | Posterior (59%), anterolateral, extended troch. osteotomy | Radiographic: AP                                          | NA                                   | 0-11 y<br>mean 27 m |
| Timperley et al. (2016) | Retrospective Case-Control using Prospective Data | 1578 (139) |      | 51 (48) | 3.23 | Posterior (96%)                                           | Radiographic: AP (OrthoView) - Murray                     | 26 (73%),<br>30 (20%), 28,<br>22, 32 | > 2 m               |

A Total THA (Study group size)  
 B Patient no. (Study group size)  
 C Dislocations (Study group size)  
 D Dislocation rate (%)  
 E Surgical approach  
 F Measurement details - reference  
 G Femoral head size, mm, M – multiple  
 H Follow-up period: y – years, m – months  
 AP: anteroposterior; A: anteversion; I: inclination; NA: not assessed; CAS: computer-assisted surgery; EBRA: Ein Bild Roentgen Analyse; HAS: Hip Analysis Suite.

Table 6. Comparison of mean cup placement angles in dislocating and non-dislocating hips

| Article                      | Category                    | n     | Inclination angle (SD)<br>(range), degrees | p-value | Anteversión angle (SD)<br>(range), degrees | p-value |
|------------------------------|-----------------------------|-------|--------------------------------------------|---------|--------------------------------------------|---------|
| Lewinnek et al. (1978)       | Non-dislocators             | 113   | 44.4 (7.5)                                 |         | 15.6 (8.5)                                 |         |
|                              | Dislocators (anterior)      | 3     | 49.3                                       | NS      | 33.0                                       | 0.01    |
| Lindberg et al. (1982)       | Dislocators (posterior)     | 5     | 44.4                                       | NS      | 19.2                                       | NS      |
|                              | Non-dislocators             | 239   | 47 (8)                                     |         | 4.9 (8.9)                                  |         |
|                              | Dislocators (recurrent)     | 11    | 49 (13)                                    | NS      | 1.4 (9.4)                                  | NS      |
| Pierchon et al. (1994)       | Dislocators (non-recurrent) | 34    | 49 (9)                                     | NS      | 3.3 (11.8)                                 | NS      |
|                              | Non-dislocators             | 14    | 43.6                                       |         | 22.3                                       |         |
| Pollard et al. (1995)        | Dislocators                 | 38    | 44.5 (30–68)                               | NS      | 24.4 (–5 to 45)                            | NS      |
|                              | Non-dislocators             | 90    | 45.9 (9.3)                                 |         | 17.6 (12.6)                                |         |
| Paterno et al. (1997)        | Dislocators                 | 7     | 45.0 (7.2)                                 | 0.8     | 12.9 (7.5)                                 | 0.3     |
|                              | Non-dislocators             | 17    | 42 (32–54)                                 |         | NA                                         |         |
| Woolson et al. (1999)        | Dislocators                 | 17    | 44 (39–56)                                 | 0.3     | NA                                         |         |
|                              | Non-dislocators             | 355   | 40 (8) (15–61)                             |         | 20                                         |         |
| Li et al. (1999)             | Dislocators                 | 14    | 41 (11) (19–56)                            | 0.7     | 17                                         | NS      |
|                              | Non-dislocators             | 788   | 43 (5–60)                                  |         | 34 (0–60)                                  |         |
| Jolles et al. (2002)         | Dislocators                 | 24    | 45 (35–68)                                 | NS      | 35 (20–55)                                 | NS      |
|                              | Non-dislocators             | 21    | 48.6 (46.1–51.0)                           |         | 29.9 (26.1–33.6)                           |         |
| Nishii et al. (2004)         | Dislocators                 | 21    | 49.8 (47.1–52.4)                           | 0.4     | 27.6 (22.2–33.0)                           | 0.5     |
|                              | Non-dislocators             | 181   | 40.5 (5.4)                                 |         | 29.1 (9.8)                                 |         |
| Biedermann et al. (2005)     | Dislocators (posterior)     | 9     | 39.5 (7.9)                                 | NS      | 18.1 (11.6)                                | < 0.005 |
|                              | Non-dislocators             | 342   | 44 (6.9)                                   |         | 14.5 (4.9)                                 |         |
|                              | Dislocators (anterior)      | 38    | 47.9 (7.9)                                 | < 0.05  | 16.8 (6.5)                                 | < 0.05  |
| Masaoka et al. (2006)        | Dislocators (posterior)     | 37    | 42.4 (7.7)                                 | 0.3     | 11.0 (5.5)                                 | < 0.01  |
|                              | Non-dislocators             | 307   | 41.5 (8.7)                                 |         | 15.5 (11.9)                                |         |
|                              | Dislocators (anterior)      | 2     | 47.0 (12.7)                                | NA      | 42.0 (12.7)                                | NA      |
| Minoda et al. (2006)         | Dislocators (posterior)     | 8     | 46.8 (6.5)                                 | NS      | 4.5 (6.6)                                  | < 0.01  |
|                              | Non-dislocators             | 806   | 44.3 (6.5) (25–66)                         |         | 17.9 (6.3) (0–37)                          |         |
| Kim et al. (2009)            | Dislocators                 | 28    | 45.5 (6.5) (32–58)                         | 0.3     | 17.6 (7.1) (4–57)                          | 0.8     |
|                              | Non-dislocators             | 1,588 | 42.5 (6.1) (35–58)                         |         | 29.3 (8.11) (8–37)                         |         |
| Leichtle et al. (2013)       | Dislocators                 | 60    | 47.3 (9.2) (33–64)                         | 0.02    | 20.7 (12.8) (–8 to 45)                     | 0.002   |
|                              | Non-dislocators             | 55    | 43                                         |         | 15                                         |         |
| Grammatopoulos et al. (2015) | Dislocators                 | 56    | 42                                         | > 0.8   | 14.5                                       | NS      |
|                              | Non-dislocators             | 1,048 | 45.7 (21–74)                               |         | 10.3 (–16 to 39)                           |         |
| Fujishiro et al. (2015)      | Dislocators                 | 22    | 47.2 (37–64)                               | 0.5     | 7.2 (–33 to 20)                            | 0.3     |
|                              | Non-dislocators             | 1,505 | 40.9 (6.05)                                |         | 24.5 (11.3)                                |         |
| Garcia-Rey et al. (2015)     | Dislocators                 | 50    | 43.2 (6.04)                                | NS      | 23.3 (15.3)                                | NS      |
|                              | Dislocators (posterior)     | 41    | 42.8 (9.4)                                 | NS      | 20.1 (13.8)                                | 0.0002  |
|                              | Dislocators (anterior)      | 9     | 40.9 (6.0)                                 | NS      | 37.7 (14.3)                                | 0.003   |
| Opperer et al. (2015)        | (vs. posterior dislocators) |       |                                            |         |                                            |         |
|                              | (vs. non-dislocators)       |       |                                            |         |                                            |         |
| Timperley et al. (2016)      | Non-dislocators             | 1,280 | 45.6 (6.1)                                 |         | 16.3 (6.7)                                 |         |
|                              | Dislocators                 | 38    | 48.8 (10.9)                                | 0.003   | 16.8 (9.1)                                 | 0.7     |
| Timperley et al. (2016)      | Non-dislocators             | 111   | 40.79 (4.31)                               |         | 16.62 (5.07)                               |         |
|                              | Dislocators                 | 37    | 41.65 (4.08)                               | 0.1     | 17.73 (5.77)                               | 0.06    |
| Timperley et al. (2016)      | Non-Dislocators             | 91    | 45.0 (3.8) (34.8–53.9)                     |         | 18.6 (9.2) (–0.1 to 45.5)                  |         |
|                              | Dislocators                 | 48    | 44.8 (5.2) (27.8–62.7)                     | 0.8     | 18.9 (9.3) (3.9 – 38.5)                    | 0.8     |

NA: not assessed; NS, not significant.

Table 7. Target zone analysis

| Article                      | Total no. of THAs or patients (Study group size) | Dislocations assessed | Inclination, degrees | Anteversion, degrees | Statistical significance for target zone p-value | Other statistical assessment                                                            |
|------------------------------|--------------------------------------------------|-----------------------|----------------------|----------------------|--------------------------------------------------|-----------------------------------------------------------------------------------------|
| Lewinnek et al. (1978)       | 300 (122)                                        | 9                     | 30–50                | 5–25                 | < 0.045                                          |                                                                                         |
| Paterno et al. (1997)        | 391 (34)                                         | 17                    | 35–45                | NA                   | 0.3                                              |                                                                                         |
| Woolson et al. (1999)        | 315                                              | 14                    | 35–45                | NA                   | 0.5                                              |                                                                                         |
| Jolles et al. (2002)         | 2023 (42)                                        | 21                    | NA                   | < 50                 | NS                                               |                                                                                         |
| Nishii et al. (2004)         | 217 (191)                                        | 9                     | NA                   | > 20                 |                                                  | 83% ND vs. 22% D in target zone                                                         |
| Biedermann et al. (2005)     | 3,781 (433)                                      | 91                    | 35–55                | 5–25                 | < 0.01                                           | 93% ND vs. 67% D in target zone                                                         |
| Masaoka et al. (2006)        | 317                                              | 10                    | NA                   | 20–30                |                                                  |                                                                                         |
| Rittmeister et al. (2006)    | 512 (361)                                        | 36                    | 35–55                | 5–25                 | 0.4                                              |                                                                                         |
| Kim et al. (2009)            | 1648                                             | 60                    | NA                   | 10–35                |                                                  |                                                                                         |
| Dudda et al. (2010)          | 36,326 (826)                                     | 175                   | 45–50                | 10–15                | NS                                               |                                                                                         |
| Jørgensen et al. (2014)      | 2734                                             | 43                    | 36–60                | 10–15                | 0.4                                              | D outside vs. inside:<br>OR 1.52, 95% CI 0.54–4.26                                      |
| Esposito et al. (2015)       | 7,040 (294)                                      | 147                   | 38–58                | 14–34                |                                                  | OR 0.70 (D vs. ND inside)                                                               |
| Grammatopoulos et al. (2015) | 1070                                             | 22                    | 27–57                | –3 to 27             | 0.01                                             | Dislocation rate:<br>1.8% inside vs. 7% outside                                         |
| McLawnhorn et al. (2015)     | 533                                              | 6                     | 30–50                | 15–35                | 0.3                                              |                                                                                         |
| Fujishiro et al. (2015)      | 1,555                                            | 50                    | NA                   | 10–30                | 0.03 (MV)                                        | D outside vs. inside:<br>MV: OR 1.9, 95% CI 1.08–3.36                                   |
| Danoff et al. (2015)         | 1,289                                            | 42                    | 30–50                | 10–25                | 0.007 (UV)<br>0.009 (MV)                         | D outside vs. inside:<br>UV: OR 2.69, 95% CI 1.31–5.52<br>MV: OR 2.57, 95% CI 1.28–5.56 |
| Garcia-Rey et al. (2015)     | 1,414                                            | 38                    | 35–50<br>35–50       | 5–25<br>15–25        | 0.001 (UV)<br>< 0.001 (MV)<br>0.001              | D outside vs. inside:<br>UV: 95% CI 2.19–7.83<br>MV: 95% CI 1.78–6.55                   |

NA: not assessed; NS: not significant; UV: univariate analysis; MV: multivariate analysis; D: dislocators; ND: non-dislocators; OR: odds ratio; CI: confidence interval.
